# Supplementary material for: Hyperhomocysteinemia causes ER stress and impaired autophagy that is reversed by Vitamin B supplementation
Source: PubMed Central journal article supplement (PMC5260994; doi:10.1038/cddis.2016.374), 2016-12-08

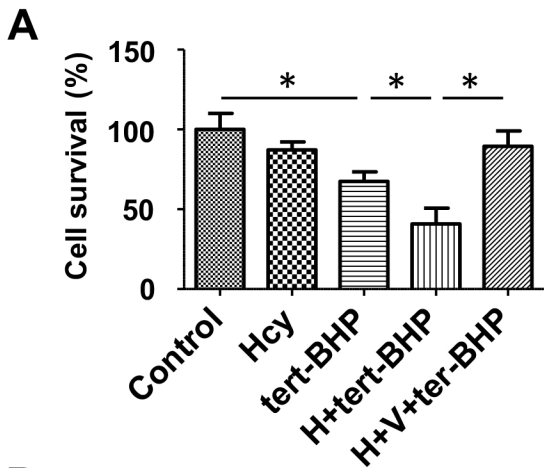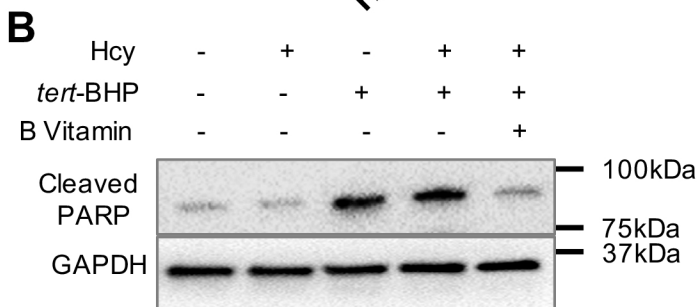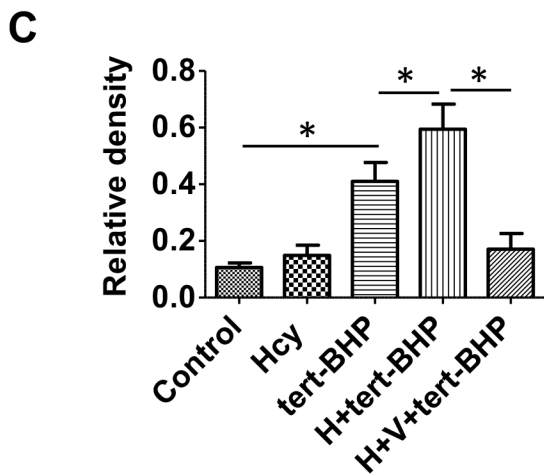

Supplement: cddis2016374x6.pdf [file cddis2016374x6.pdf]
