# Supplementary material for: Hyperhomocysteinemia causes ER stress and impaired autophagy that is reversed by Vitamin B supplementation
Source: PubMed Central journal article supplement (PMC5260994; doi:10.1038/cddis.2016.374), 2016-12-08
Supplement: cddis2016374x7.pdf [file cddis2016374x7.pdf]

# Vitamin B<sub>12</sub>, B<sub>6</sub> and Folate

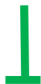

**Hcy**

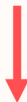

**MTOR signaling**

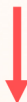

**Lysosomal dysfunction**

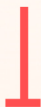

**AUTOPHAGY**

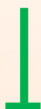

**ER stress**
