# Supplementary material for: Hyperhomocysteinemia causes ER stress and impaired autophagy that is reversed by Vitamin B supplementation
Source: PubMed Central journal article supplement (PMC5260994; doi:10.1038/cddis.2016.374), 2016-12-08
Supplement: cddis2016374x9.pdf [file cddis2016374x9.pdf]

| Diet                                                                    | SAM, nmol/g | SAH, nmol/g | SAM/SAH      |
|-------------------------------------------------------------------------|-------------|-------------|--------------|
| Control (AIN93M)                                                        | 12.8±0.5    | 1.4±0.14    | <b>9.14</b>  |
| M <sup>+</sup> B <sup>-</sup><br>Methionine rich<br>B Vitamin deficient | 13.2±0.8    | 3.2±0.3     | <b>4.125</b> |
| M <sup>+</sup> B <sup>+</sup> Methionine rich<br>B Vitamin rich         | 12.0±0.4    | 1.08±0.2    | <b>11.11</b> |
